# Supplementary material for: Natural variation in Tiller Number 1 affects its interaction with TIF1 to regulate tillering in rice
Source: PubMed Central journal article supplement — Plant Biotechnol J. 2023 Feb 28;21(5):1044–57. doi: 10.1111/pbi.14017 (PMC10106862; doi:10.1111/pbi.14017), 2023-02-28
Supplement: PBI-21-1044-s007.pdf [file PBI-21-1044-s007.pdf]

## **Natural variation in Tiller Number 1 affects its interaction with TIF1 to regulate tillering in rice**

Quan Zhang<sup>1,†</sup>, Jianyin Xie<sup>1,†</sup>, Xiaoyang Zhu<sup>1</sup>, Xiaoqian Ma<sup>1</sup>, Tao Yang<sup>1</sup>, Najeeb Ullah Khan<sup>1</sup>, Shuyang Zhang<sup>1</sup>, Miaosong Liu<sup>1</sup>, Lin Li<sup>1</sup>, Yuntao Liang<sup>4</sup>, Yinghua Pan<sup>4</sup>, Danting Li<sup>4</sup>, Jinjie Li<sup>1</sup>, Zichao Li<sup>1,2</sup>, Hongliang Zhang<sup>1,2,3,\*</sup>, Zhanying Zhang<sup>1,\*</sup>

<sup>1</sup>MOE Key Laboratory of Crop Heterosis and Utilization/Beijing Key Laboratory of Crop Genetic Improvement, College of Agronomy and Biotechnology, China Agricultural University, Beijing 100193, China.

<sup>2</sup>Sanya Institute of China Agricultural University, Sanya 572025, China.

<sup>3</sup>Sanya Nanfan Research Institute of Hainan University, Sanya 572025, China.

<sup>4</sup>Guangxi Key Laboratory of Rice Genetics and Breeding, Rice Research Institute of Guangxi Academy of Agricultural Sciences, Nanning 530007, Guangxi, China.

**Figure S1** Population structure of 295 rice accessions

**Figure S2** Functional variation analysis of *TN1*.

**Figure S3** Haplotype and expression analysis of candidate gene in *qTN2*.

**Figure S4** Target sites in *tn1-2*, *tn1-3*, and *tn1-4* lines and the phenotype of *tn1-4*

**Figure S5** Comparison of tiller buds among the NIP, *tn1-1*, and *TN1*-OE lines

**Figure S6** Subcellular localization of *TN1*-GFP fusion protein in tobacco leaves

**Figure S7** Expression pattern of *TN1* in different tissues of NIP, as determined by qRT-PCR

**Figure S8** Phylogenetic analysis of TIF1 and OsEDM2 proteins and relationship of *TN1* and TIF1 in tobacco leaves

**Figure S9** Interaction among *TN1*, TIF1, and OsEDM2

**Figure S10** Enrichment analysis of 5,778 DEGs

**Figure S11** Expression levels of *DLT*, *OsTB1*, *OsPIN2*, *OsPIN5b*, and *TIF1* in NIP, *tn1-1*, and *TN1*-OE lines and expression level of *TN1* in *tif1* lines

**Figure S12** Evolutionary pattern of *TN1* based on minimum spanning

**Figure S13** Genome constitution of NIL-*TN1*<sup>CH1230</sup>

**Figure S14** Haplotype analysis of *TIF1*

**Figure S15** Expression levels of *D14* among different combination of *TN1* and *TIF1* haplotypes in natural germplasms.

**Figure S16** *TN1* is induced by nitrogen treatment

**Table S1** Nucleotide diversity and selection analysis of *TN1*

**Supplemental Dataset 1** List of the 295 varieties used in this study.

**Supplemental Dataset 2** The QTLs associated with tiller numbers.

**Supplemental Dataset 3** The candidate gene in *qTN2*.

**Supplemental Dataset 4** The differentially expressed genes between NIP and *tn1-1*.

**Supplemental Dataset 5** The alternative 3' splicing between NIP and *tn1-1* lines.

**Supplemental Dataset 6** Primers used in the study.

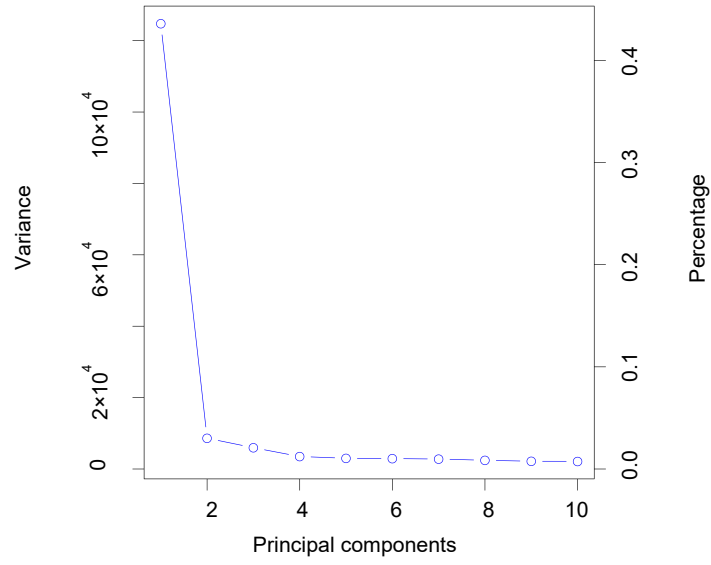

**Figure S1 Population structure of 295 rice accessions**

In total, 3,874,812 high-quality SNPs (MAF  $\geq$  5%, missing rate < 50%) were used to determine the population structure.

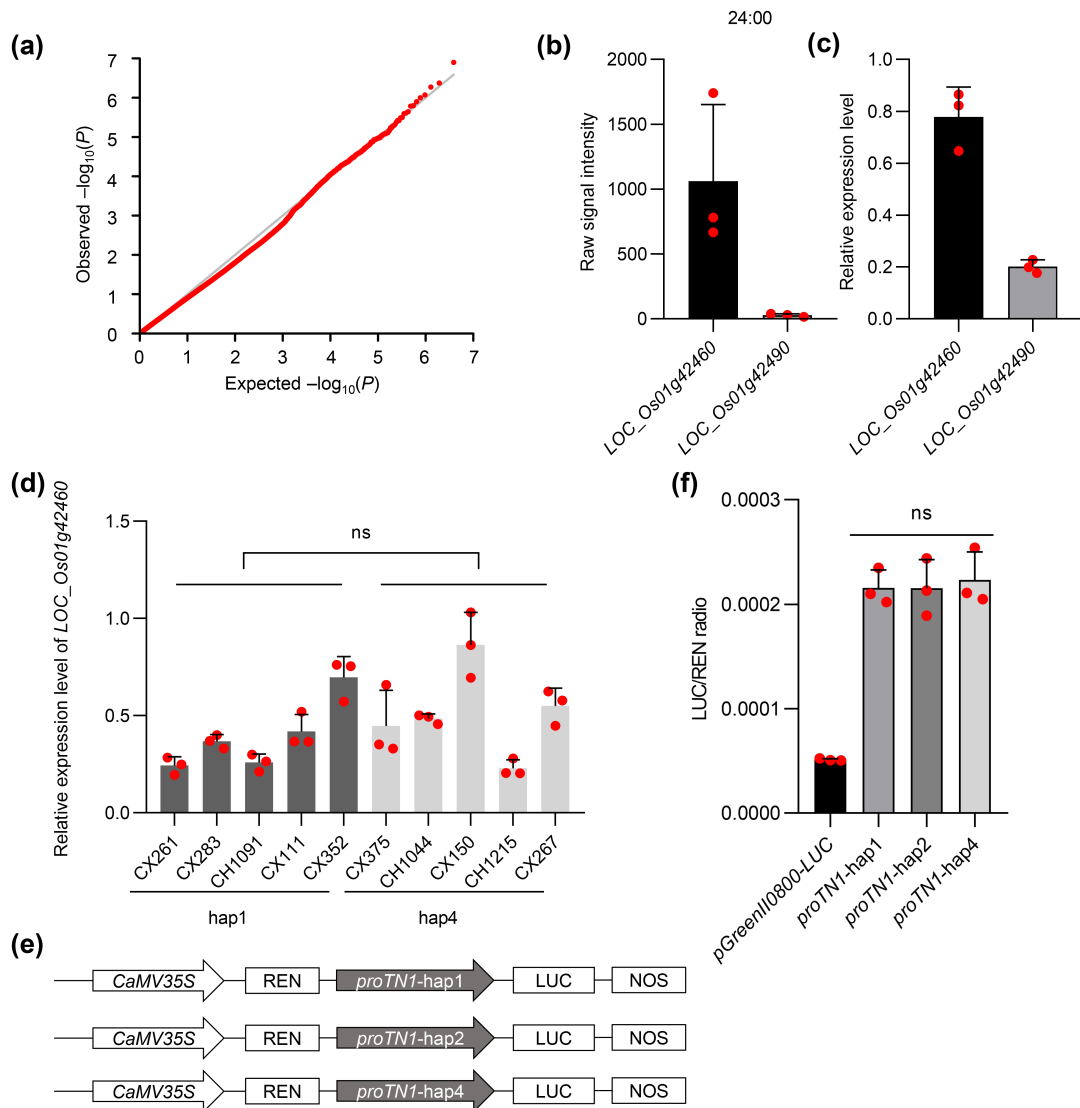

### Figure S2 Functional variation analysis of *TN1*

(a) Quantile–quantile plots of the mixed linear model (MLM). (b) Expression levels of *LOC\_Os01g42460* and *LOC\_Os01g42490* in roots at 24:00 during the vegetative period; data were derived from RiceXpro (<https://ricexpro.dna.affrc.go.jp/>). (c) Expression levels of *LOC\_Os01g42460* and *LOC\_Os01g42490* at the base of tiller buds at 45 days after transplanting. (d) Expression levels of *LOC\_Os01g42460* in germplasm materials; RNA was extracted from tiller buds at 30 days after transplanting. (e) Schematic diagram showing constructs used for the analysis of the 2.6 kb promoter. (f). Comparison of *proTN1*-hap1, *proTN1*-hap2, and *proTN1*-hap4. *P*-values in (c) and (e) were determined using two-tailed Student's *t*-test.

(a)

| LOC_Os01g42370_hap |      |      |     |    |          |       |       |       |       |       |       |             |               |       |                          |
|--------------------|------|------|-----|----|----------|-------|-------|-------|-------|-------|-------|-------------|---------------|-------|--------------------------|
| Sub                | Hap  | Exon |     |    | Promoter |       |       |       |       |       |       | No. of cvs. | No. of tiller |       |                          |
|                    |      | 5851 | 658 | 46 | -408     | -1025 | -1031 | -1067 | -1068 | -1167 | -1440 |             |               | -1478 | -1721                    |
| Ind                | hap1 | C    | A   | A  | T        | C     | C     | C     | T     | A     | A     | G           | C             | 26    | 12.87±0.39 <sup>a</sup>  |
|                    | hap2 | C    | G   | C  | C        | T     | A     | T     | C     | A     | A     | A           | T             | 4     | 11.58±0.34 <sup>ab</sup> |
|                    | hap3 | C    | G   | C  | C        | T     | A     | T     | C     | G     | A     | A           | T             | 12    | 10.92±0.54 <sup>b</sup>  |
|                    | hap4 | G    | G   | C  | C        | T     | A     | T     | C     | G     | T     | A           | T             | 90    | 9.82±0.16 <sup>c</sup>   |
| Jap                | hap3 | C    | G   | C  | C        | T     | A     | T     | C     | G     | A     | A           | T             | 123   | 8.88±0.20                |
|                    | hap4 | G    | G   | C  | C        | T     | A     | T     | C     | G     | T     | A           | T             | 3     | 7.13±0.89                |

  

| LOC_Os01g42380_hap |      |          |       |       |             |                         |
|--------------------|------|----------|-------|-------|-------------|-------------------------|
| Sub                | Hap  | Promoter |       |       | No. of cvs. | No. of tiller           |
|                    |      | -1363    | -1593 | -1603 |             |                         |
| Ind                | hap1 | A        | C     | A     | 116         | 10.06±0.15 <sup>b</sup> |
|                    | hap2 | C        | T     | G     | 29          | 12.45±0.39 <sup>a</sup> |
| Jap                | hap1 | A        | C     | A     | 137         | 8.73±0.19               |

  

| LOC_Os01g42410_hap |      |          |             |                         |
|--------------------|------|----------|-------------|-------------------------|
| Sub                | Hap  | Promoter | No. of cvs. | No. of tiller           |
|                    |      | -426     |             |                         |
| Ind                | hap1 | A        | 30          | 12.6±0.37 <sup>a</sup>  |
|                    | hap2 | G        | 116         | 10.05±0.15 <sup>b</sup> |
| Jap                | hap2 | G        | 135         | 8.72±0.19               |

  

| LOC_Os01g42470_hap |      |          |       |       |      |      |      |      |             |               |                         |
|--------------------|------|----------|-------|-------|------|------|------|------|-------------|---------------|-------------------------|
| Sub                | Hap  | Promoter |       |       |      |      |      |      | No. of cvs. | No. of tiller |                         |
|                    |      | -1271    | -1154 | -1038 | -554 | -470 | -385 | -381 |             |               | -210                    |
| Ind                | hap1 | G        | A     | A     | C    | G    | A    | A    | C           | 97            | 9.81±0.16 <sup>b</sup>  |
|                    | hap2 | G        | G     | G     | C    | G    | C    | G    | T           | 13            | 11.39±0.46 <sup>a</sup> |
|                    | hap3 | T        | G     | G     | T    | A    | C    | G    | T           | 25            | 12.63±0.40 <sup>a</sup> |
| Jap                | hap1 | G        | A     | A     | C    | G    | A    | A    | C           | 2             | 7.55±1.24               |
|                    | hap2 | G        | G     | G     | C    | G    | C    | G    | T           | 120           | 8.82±0.2                |

  

| LOC_Os01g42480_hap |      |          |             |                         |
|--------------------|------|----------|-------------|-------------------------|
| Sub                | Hap  | Promoter | No. of cvs. | No. of tiller           |
|                    |      | -1394    |             |                         |
| Ind                | hap1 | A        | 30          | 12.59±0.37 <sup>a</sup> |
|                    | hap2 | T        | 118         | 10±0.15 <sup>b</sup>    |
| Jap                | hap2 | T        | 136         | 8.71±0.19               |

  

| LOC_Os01g42490_hap |      |      |          |      |             |                         |
|--------------------|------|------|----------|------|-------------|-------------------------|
| Sub                | Hap  | Exon | Promoter |      | No. of cvs. | No. of tiller           |
|                    |      | 1700 | -235     | -250 |             |                         |
| Ind                | hap1 | A    | C        | C    | 30          | 12.59±0.37 <sup>a</sup> |
|                    | hap2 | G    | A        | A    | 81          | 9.85±0.17 <sup>c</sup>  |
|                    | hap3 | G    | C        | C    | 14          | 11.23±0.45 <sup>b</sup> |
| Jap                | hap2 | G    | A        | A    | 3           | 7±0.94                  |
|                    | hap3 | G    | C        | C    | 131         | 8.8±0.20                |

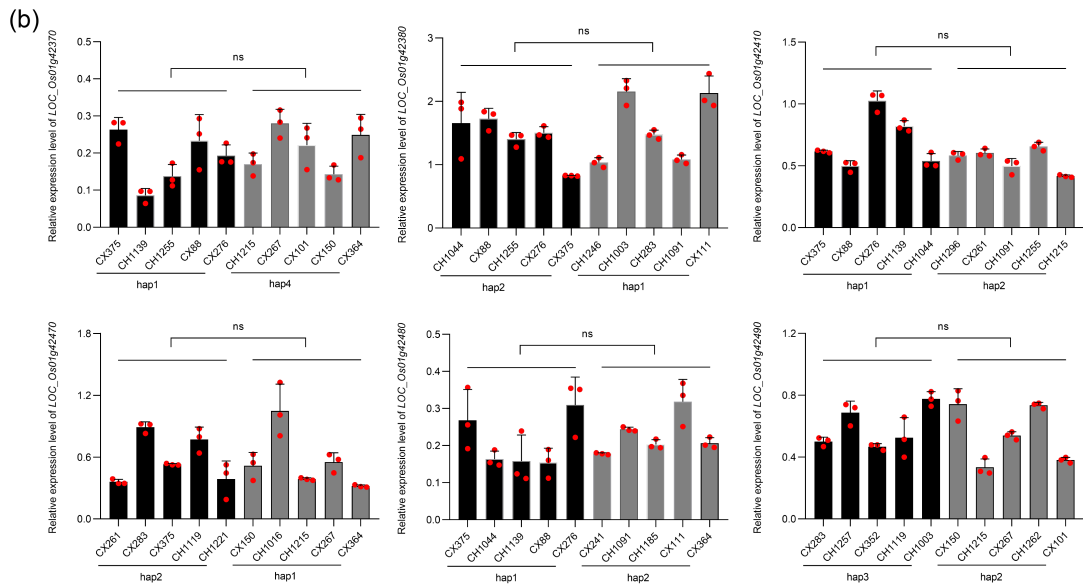

**Figure S3** Haplotype and expression analysis of candidate gene in *qTN2*

(a) Haplotypes (hap) of *LOC\_Os01g42370*, *LOC\_Os01g42380*, *LOC\_Os01g42410*, *LOC\_Os01g42470*, *LOC\_Os01g42480*, and *LOC\_Os01g42490* in *qTN2* among germplasm materials; major and minor alleles are indicated in yellow and green, respectively. Data are presented as mean ± SE. Different letters indicate significant differences at  $P < 0.05$

according to two-sided Student's *t*-test. (b) Expression levels of *LOC\_Os01g42370*, *LOC\_Os01g42380*, *LOC\_Os01g42410*, *LOC\_Os01g42470*, *LOC\_Os01g42480*, and *LOC\_Os01g42490* in *qTN2* among germplasm materials; RNA was extracted from tiller buds at 30 days after transplanting.

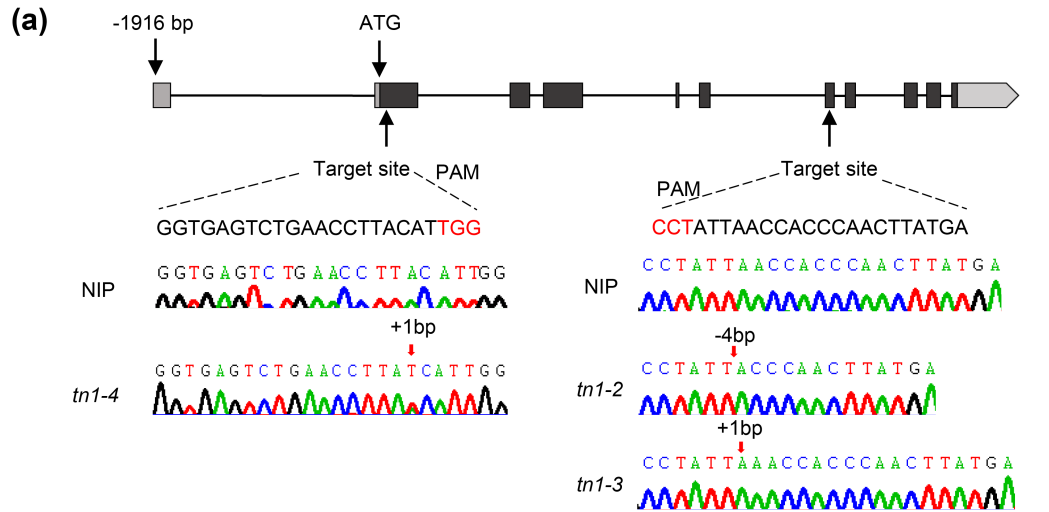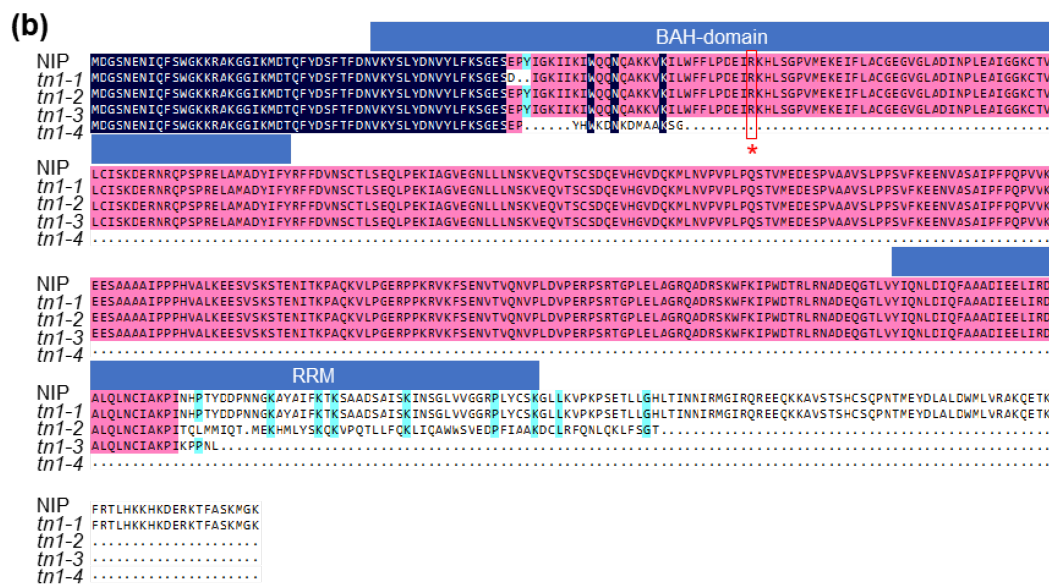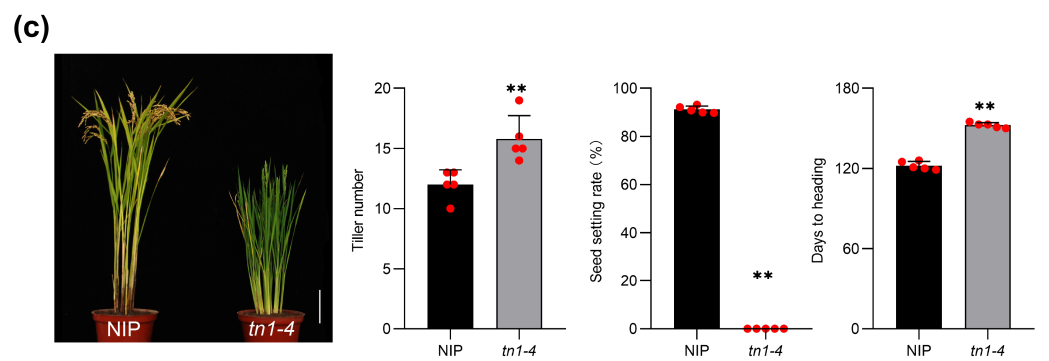

**Figure S4 Target sites in *tn1-2*, *tn1-3*, and *tn1-4* lines and the phenotype of *tn1-4***

(a) A 4 bp fragment was deleted from line *tn1-2*, a 1 bp fragment was inserted into the target site of *TN1* in line *tn1-3* and *tn1-4*, respectively. (b) Amino acid sequence analysis of NIP, *tn1-1*, *tn1-2*, *tn1-3*, and *tn1-4* lines. The red frame

and asterisk represent the 83<sup>rd</sup> amino acid, which is a natural mutation, and the blue frame represents the BAH domain and RRM. (c) Phenotypes of NIP, *tn1-4* at the reproductive stage. *P*-values were determined using two-tailed Student's *t*-tests. \*\**P* < 0.01. Data are presented as mean ± SD. (*n* = 5).



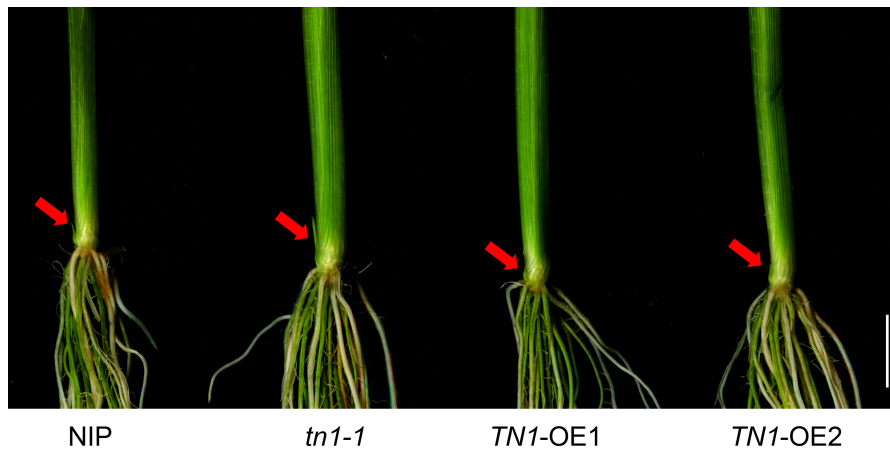

**Figure S5 Comparison of tiller buds among the NIP, *tn1-1*, and *TN1-OE* lines**

The samples were observed 3 weeks after sowing. Tiller buds of all lines grew normally. Tiller buds of NIP grew faster than those of *TN1-OE* but slower than those of *tn1-1*. Scale bar = 1 cm.

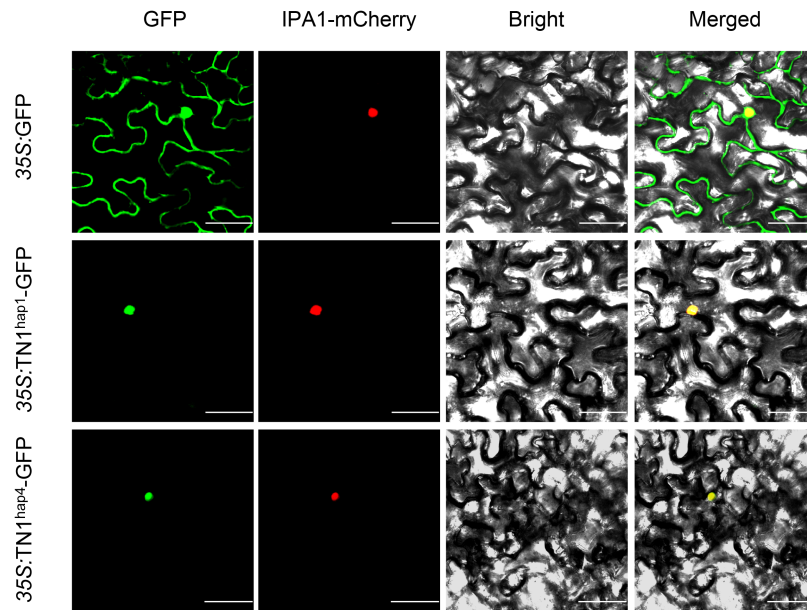

**Figure S6 Subcellular localization of *TN1*-GFP fusion protein in tobacco leaves**

*Agrobacterium tumefaciens* strain EHA105 was transfected with GFP plasmids containing different *TN1* haplotypes, and the resultant mixed bacterial suspension was injected into tobacco leaves. After 48 hours, the GFP signal was captured by confocal microscopy (Zeiss LSM880). Scale bar = 50  $\mu$ m.

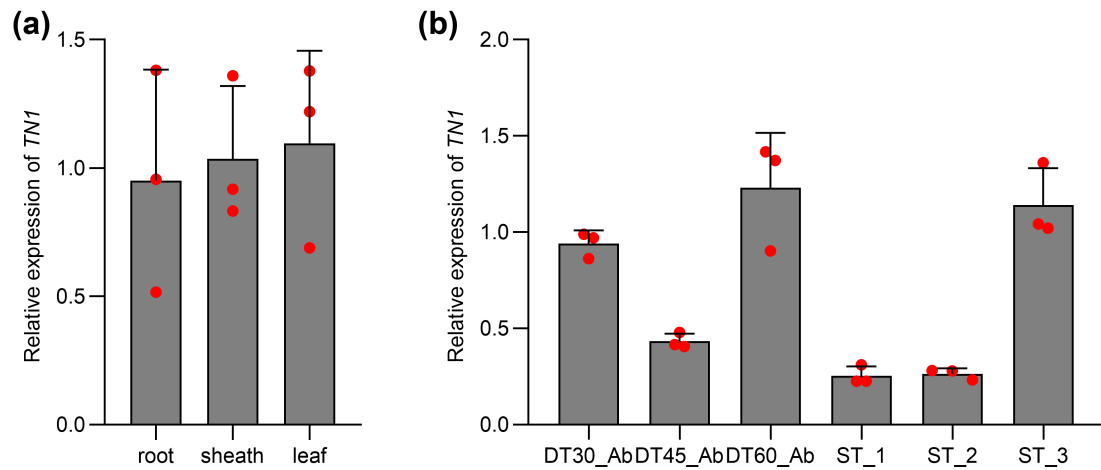

**Figure S7 Expression pattern of *TN1* in different tissues of NIP, as determined by qRT-PCR**

(a) Expression level of *TN1* in the root, leaf sheath, and leaf blade during vegetative growth. (b) Expression level of *TN1* in the base of tiller buds and stems. DT\_30, DT\_45, DT\_60, ST\_1, ST\_2, and ST\_3 represent developmental stages described in the Materials and Methods section. Data are presented as mean  $\pm$  SD ( $n = 3$  biologically independent samples).

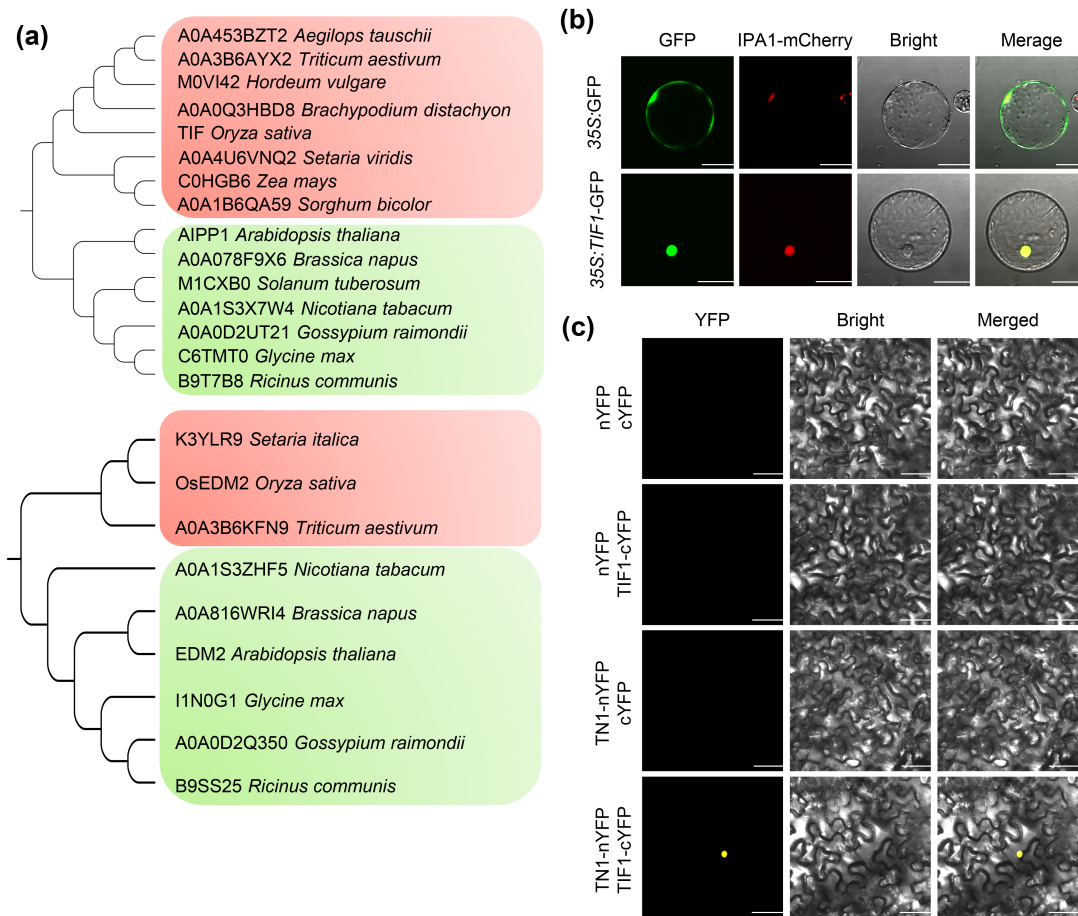

**Figure S8 Phylogenetic analysis of TIF1 and OsEDM2 proteins and relationship of TN1 and TIF1 in tobacco leaves**

(a) Phylogenetic analysis of TIF1 and OsEDM2 proteins. Monocots and dicots are indicated in orange and green, respectively. (b) Subcellular localization of the TIF1-GFP fusion protein in rice protoplasts (scale bar = 20  $\mu$ m). (c) TN1 and TIF1 interacted with each other in tobacco leaves (scale bar = 50  $\mu$ m).

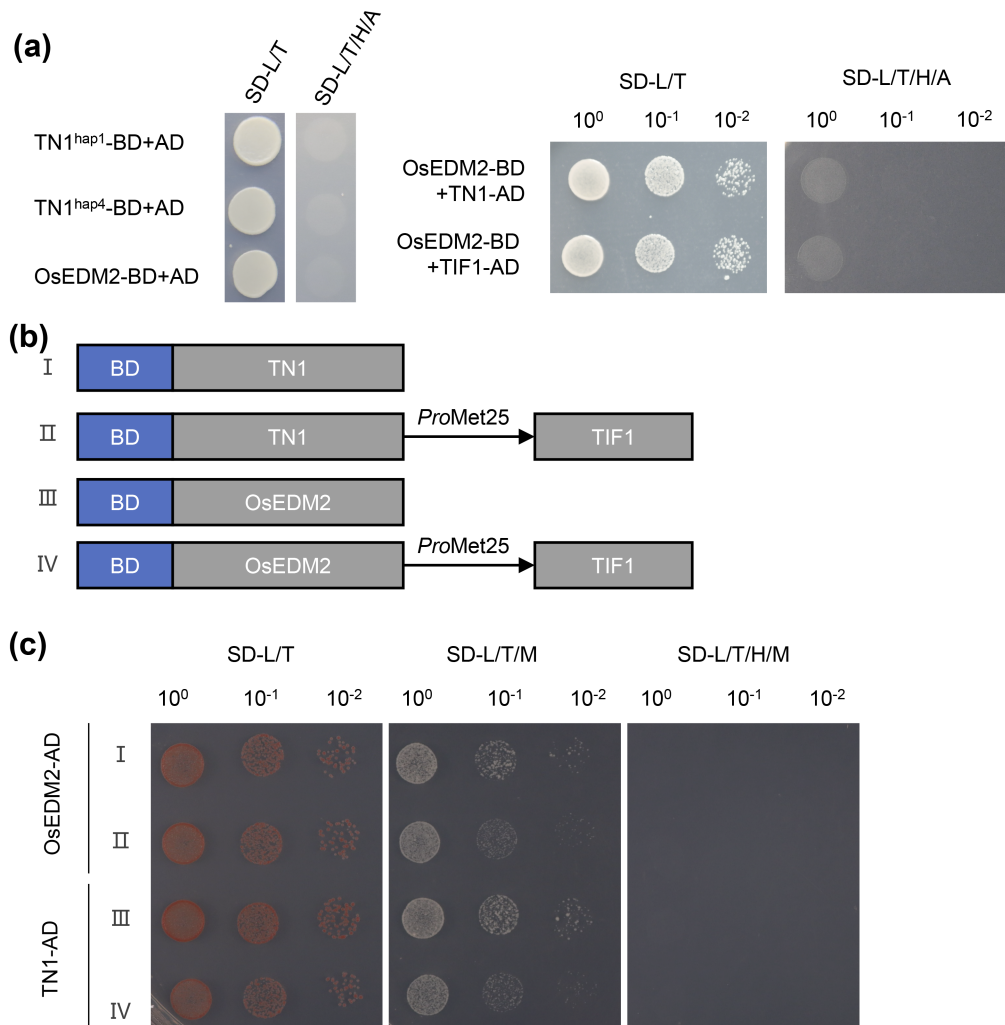

**Figure S9 Interaction among TN1, TIF1, and OsEDM2**

(a) Yeast two-hybrid (Y2H) assays showed that TIF1 cannot interact with TN1 and OsEDM2. (b) Schematics of vectors used in yeast three-hybrid assays. (c) Yeast three-hybrid (Y3H) assays showed that TN1, TIF1, and OsEDM2 could not form a complex.

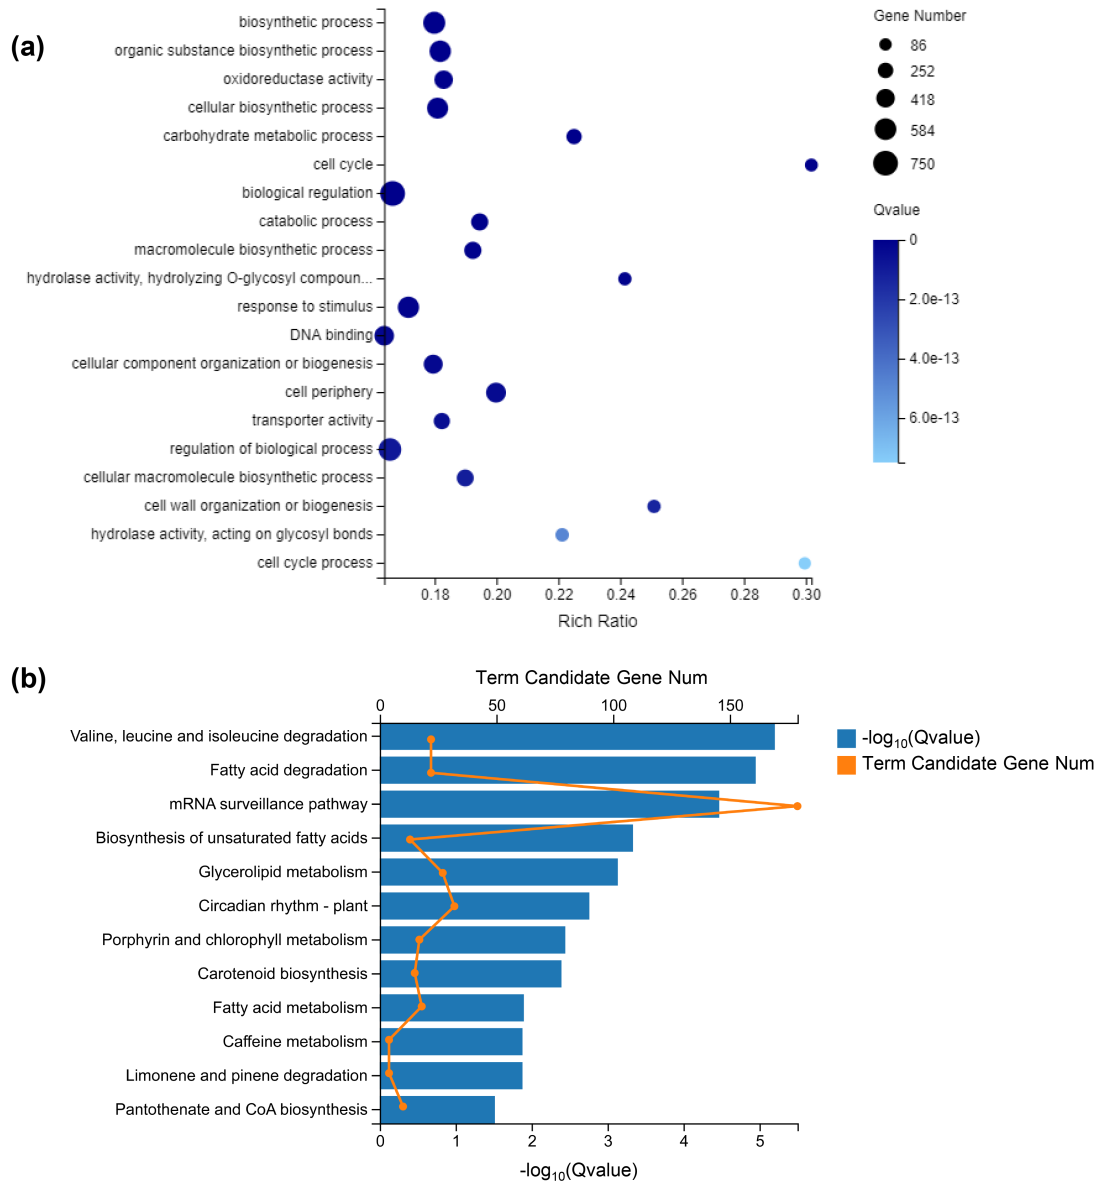

### Figure S10 Enrichment analysis of 5,778 DEGs

(a) Statistics of gene ontology (GO) enrichment between NIP and *tn1-1* lines showing the top 20 GO terms according to the Q-value. (b) Statistics of the Kyoto Encyclopedia of Genes and Genomes (KEGG) enrichment (Q-value < 0.05). [DEGs for the analysis were  $|\log_2(tn1-1/NIP)| \geq 1$ ,  $P < 0.05$ ].

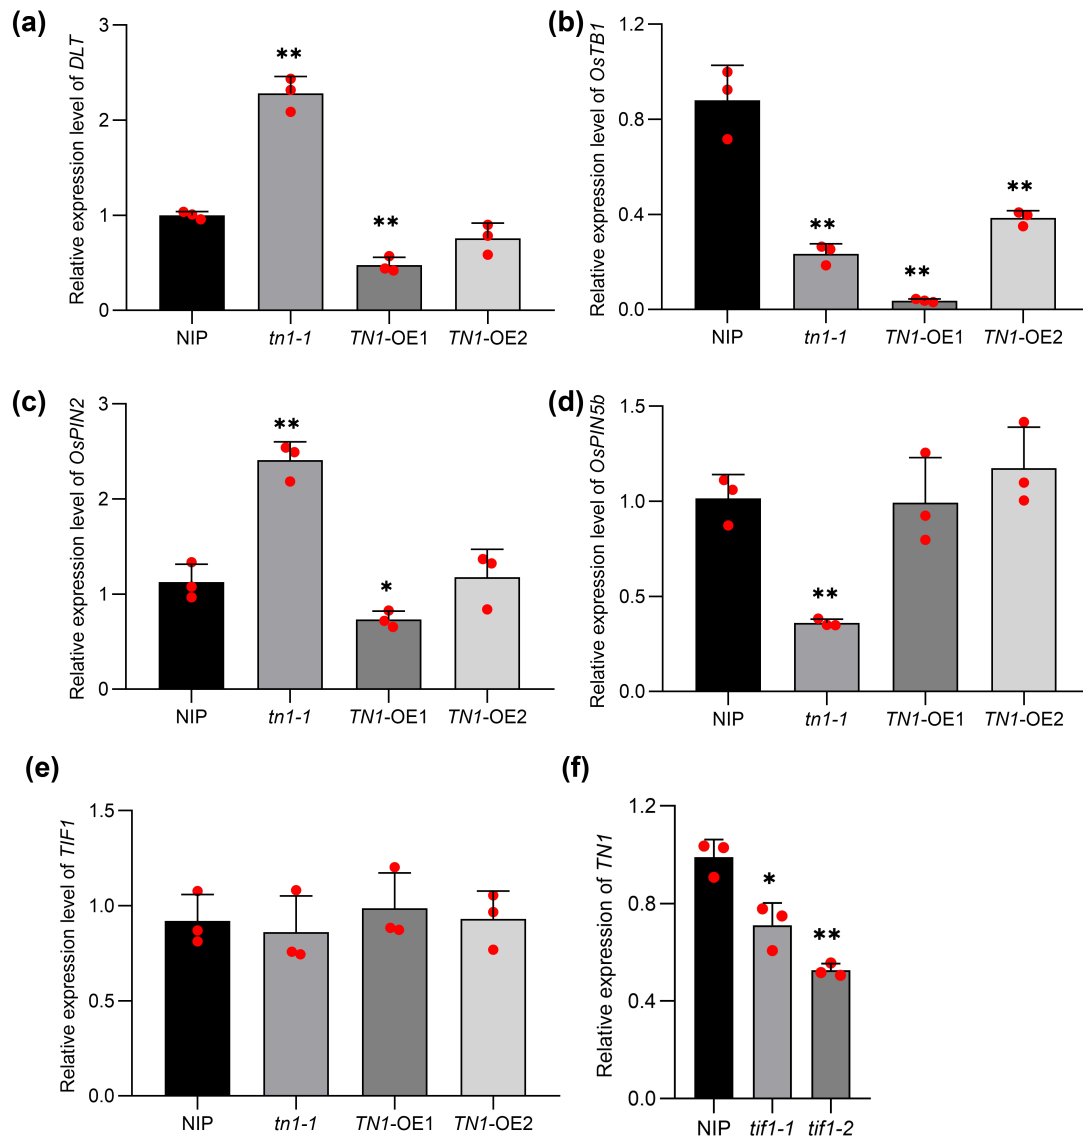

**Figure S11 Expression levels of *DLT*, *OsTB1*, *OsPIN2*, *OsPIN5b*, and *TIF1* in NIP, *tn1-1*, and *TN1-OE* lines and expression level of *TN1* in *tif1* lines**  
 (a-e) Expression levels of *DLT*, *OsTB1*, *OsPIN2*, *OsPIN5b*, and *TIF1* in the NIP, *tn1-1*, and *TN1-OE* lines. (f) *TN1* expression in the *tif1* line. Data are presented as mean  $\pm$  SD ( $n = 3$  biologically independent samples).

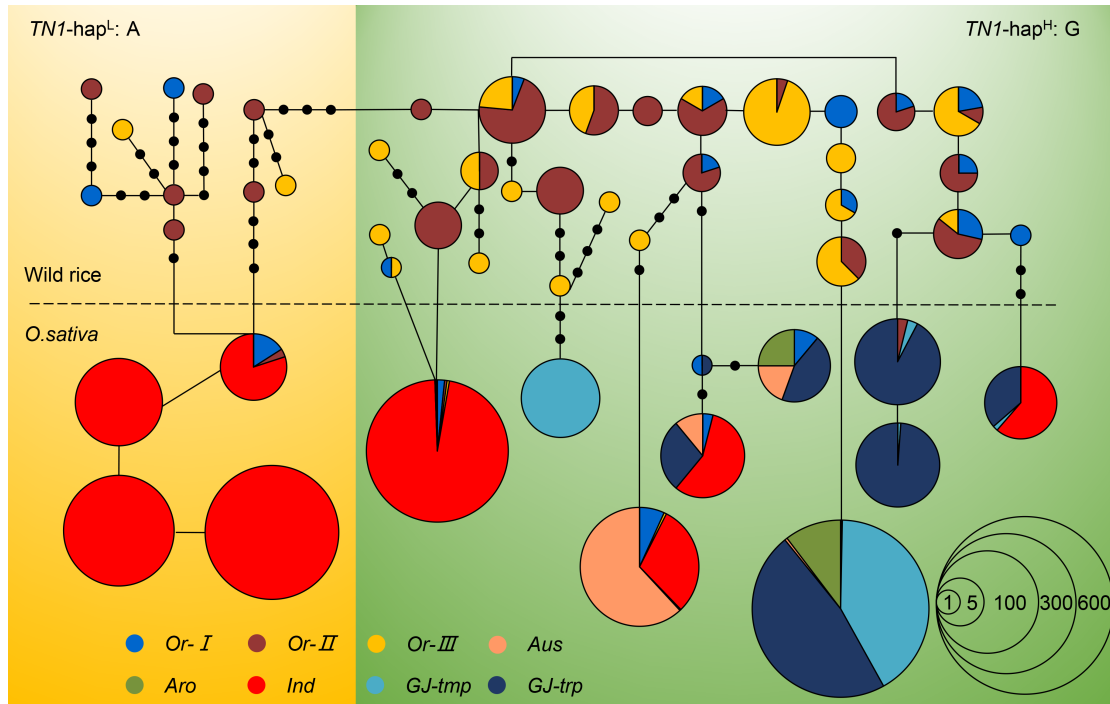

**Figure S12 Evolutionary pattern of *TN1* based on minimum spanning**

Minimum spanning tree of haplotypes, as created using methods described previously (Guo *et al.*, 2020).



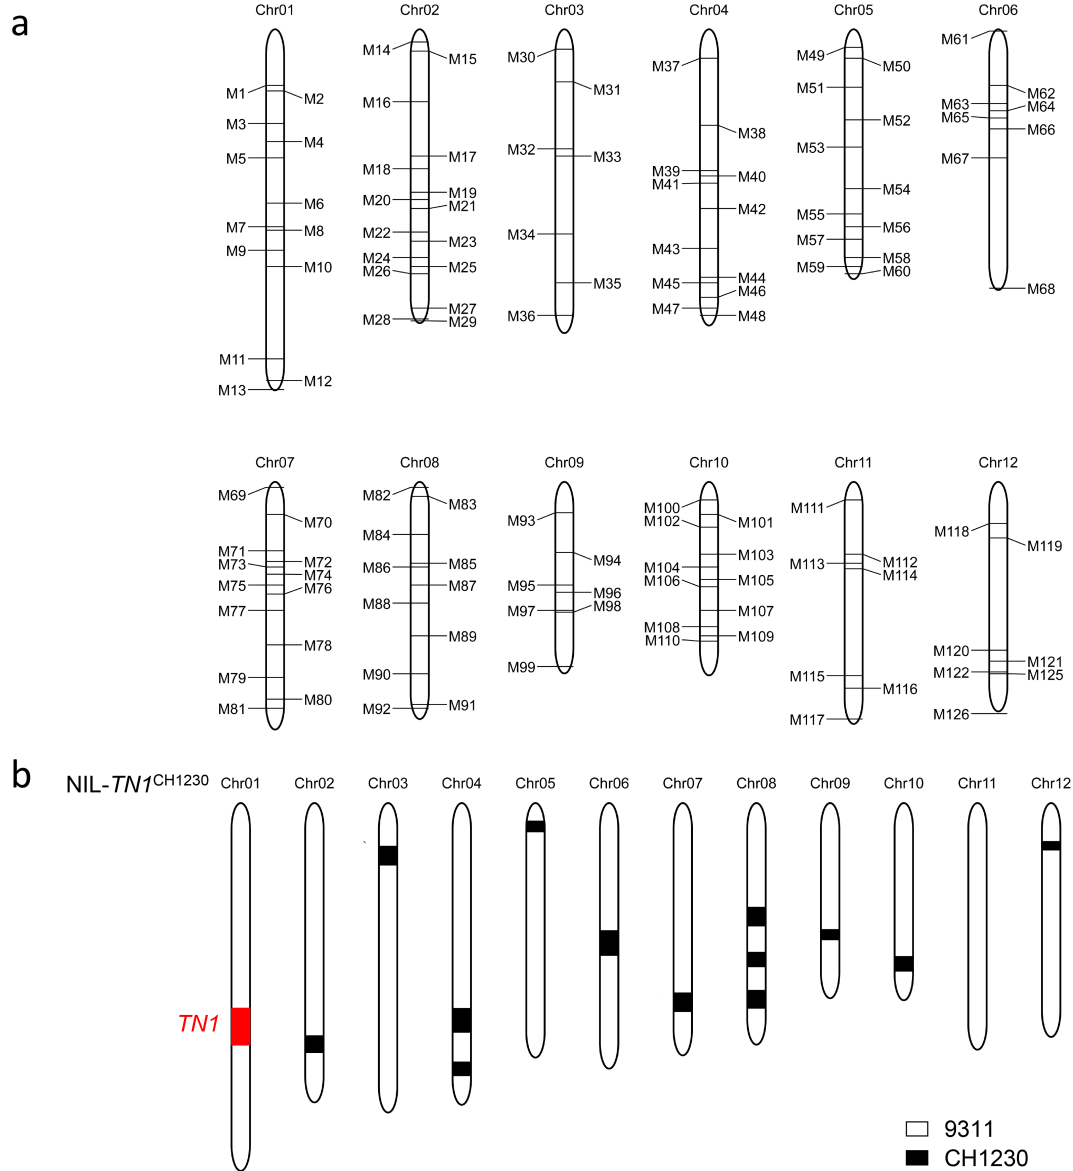

**Figure S13 Genome constitution of NIL-*TN1*<sup>CH1230</sup>**

(a) A total of 126 polymorphism markers were used to genotype NIL-*TN1*<sup>CH1230</sup>.  
 (b) Graphical genotypes of NIL-*TN1*<sup>CH1230</sup>. The red (*TN1*) and black regions indicate segments from CH1230, and the white regions indicate segments 93–11.

| Sub | Hap               | Promoter |       |       |       |       |       |       |       |      |      |      | Exon | No. of cvs. | No. of tiller |                         |
|-----|-------------------|----------|-------|-------|-------|-------|-------|-------|-------|------|------|------|------|-------------|---------------|-------------------------|
|     |                   | -2000    | -1958 | -1776 | -1627 | -1597 | -1487 | -1106 | -1020 | -877 | -817 | -808 | -277 |             |               | +744                    |
| Ind | <i>TIF1</i> -Hap1 | A        | G     | T     | G     | T     | G     | C     | C     | G    | T    | G    | G    | G           | 60            | 11.21±0.29 <sup>a</sup> |
|     | <i>TIF1</i> -Hap2 | A        | G     | T     | G     | T     | A     | C     | C     | G    | T    | G    | G    | A           | 7             | 10.76±0.79 <sup>a</sup> |
|     | <i>TIF1</i> -Hap3 | G        | A     | A     | A     | C     | A     | A     | G     | A    | G    | A    | A    | A           | 66            | 10.01±0.25 <sup>b</sup> |
| Jap | <i>TIF</i> -Hap1  | A        | G     | T     | G     | T     | G     | C     | C     | G    | T    | G    | G    | G           | 8             | 7.86±0.80               |
|     | <i>TIF</i> -Hap2  | A        | G     | T     | G     | T     | A     | C     | C     | G    | T    | G    | G    | A           | 123           | 8.73±0.20               |

### Figure S14 Haplotype analysis of *TIF1*

Haplotype analysis of *TIF1* in a panel of 264 rice accessions. Data are presented as mean ± SE. Statistical significance was determined using two-sided Student's *t*-test. Different letters indicate significant differences in tiller number ( $P < 0.05$ ).

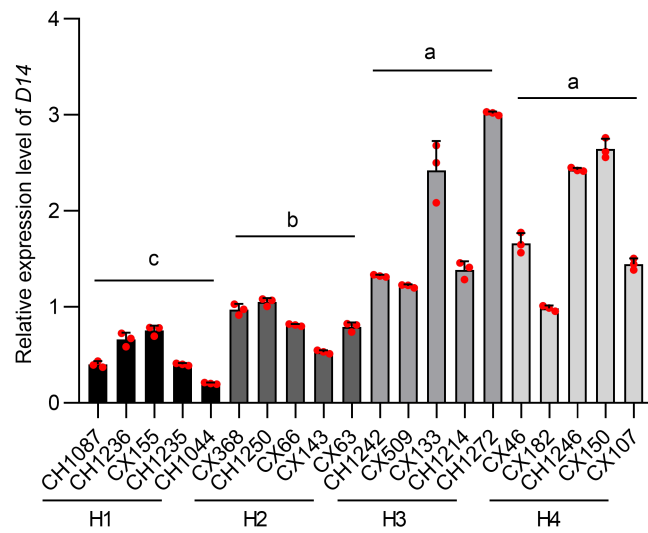

**Figure S15 Expression levels of *D14* among different combination of *TN1* and *TIF1* haplotypes in natural germplasms. Data are presented as mean  $\pm$  SD ( $n = 3$ ).**

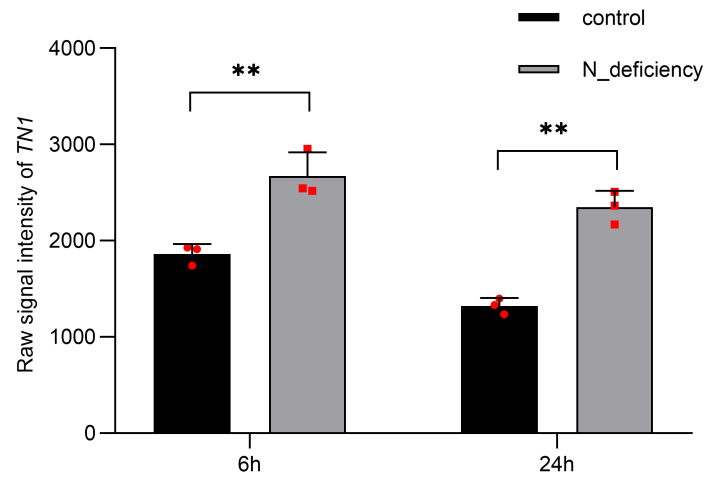

**Figure S16 *TN1* is induced by nitrogen treatment**

*TN1* expression in roots with and without nitrogen treatment. Data were obtained from RiceXpro (<https://ricexpro.dna.affrc.go.jp/>).

**Table S1 Nucleotide diversity and selection analysis of *TN1***

| Taxon         | n    | L    | S  | H  | $\pi$   | Tajima' <i>D</i> |
|---------------|------|------|----|----|---------|------------------|
| <i>Orl</i>    | 63   | 9258 | 27 | 22 | 0.13741 | -0.66505         |
| <i>OrII</i>   | 69   | 9258 | 14 | 13 | 0.0451  | -1.79818         |
| <i>OrIII</i>  | 89   | 9258 | 11 | 14 | 0.02823 | -1.89521         |
| <i>Ind</i>    | 1123 | 9258 | 24 | 18 | 0.05934 | -0.41359         |
| <i>GJ-tmp</i> | 284  | 9258 | 34 | 7  | 0.04538 | -1.18705         |
| <i>GJ-trp</i> | 472  | 9258 | 45 | 16 | 0.03673 | -1.3057          |
| <i>Aus</i>    | 196  | 9258 | 22 | 12 | 0.02694 | -1.37571         |
| <i>Aro</i>    | 75   | 9258 | 25 | 5  | 0.05701 | -0.74775         |

**Table S1 Nucleotide diversity and selection analysis of *TN1***

Nucleotide diversity and Tajima's *D* value in the *TN1* genome region and 2 kb promoter. n: total number of samples; L: average sequence length; S: number of segregating sites; H: number of haplotypes;  $\pi$ : average number of pairwise nucleotide differences per site based on the total number of polymorphic sites.
